# Supplementary material for: Molecular mechanism of ZmWRKY36 mediated maize resistance to Bipolaris maydis
Source: Research Square preprint supplement (doi:10.21203/rs.3.rs-7738242/v1), 2025-10-26
Supplement: Supplementary file 1 [file 13f0273ccb5fe34e09e981d8.docx]

| **Supplementary Table 1 Gene list of domain and motif analyze** | |
| --- | --- |
| IIe WRKY Gene Name | Gene ID |
| ZmWRK36 | Zm00001eb169460_T001 |
| ZmWRKY003 | Zm00001eb025220_T001 |
| ZmWRKY012 | Zm00001eb064880_T002 |
| ZmWRKY014 | Zm00001eb072020_T001 |
| ZmWRKY037 | Zm00001eb153330_T001 |
| ZmWRKY038 | Zm00001eb154170_T001 |
| ZmWRKY043 | Zm00001eb159410_T001 |
| ZmWRKY051 | Zm00001eb188100_T001 |
| ZmWRKY055 | Zm00001eb203940_T002 |
| ZmWRKY061 | Zm00001eb237820_T001 |
| ZmWRKY063 | Zm00001eb251530_T002 |
| ZmWRKY068 | Zm00001eb278090_T001 |
| ZmWRKY086 | Zm00001eb335440_T001 |
| ZmWRKY091 | Zm00001eb344810_T001 |
| ZmWRKY098 | Zm00001eb358680_T001 |
| ZmWRKY105 | Zm00001eb370960_T001 |
| ZmWRKY120 | Zm00001eb430130_T001 |
