# Supplementary material for: Molecular mechanism of ZmWRKY36 mediated maize resistance to Bipolaris maydis
Source: Research Square preprint supplement (doi:10.21203/rs.3.rs-7738242/v1), 2025-10-26
Supplement: Supplementary file 2 [file 8f807a594dc6f6ec8284bf63.docx]

| **Supplementary Table 2 Gene list of homologous analyze** | |
| --- | --- |
| Gene Name | Sequence ID（NCBI） |
| ZmWRKY23 | [NP_001148624.2](https://www.ncbi.nlm.nih.gov/protein/NP_001148624.2?report=genbank&log$=protalign&blast_rank=27&RID=BRRG03P3015) |
| ZmWRKY36 | XM_008679904.4 |
| ZmWRKY45 | XP_008670731.2 |
| ZmWRKY51 | [XP_008650015.1](https://www.ncbi.nlm.nih.gov/protein/XP_008650015.1?report=genbank&log$=protalign&blast_rank=41&RID=BRRG03P3015) |
| ZmWRKY56 | PWZ10993.1 |
| ZmWRKY75 | [PWZ27788.1](https://www.ncbi.nlm.nih.gov/protein/PWZ27788.1?report=genbank&log$=protalign&blast_rank=1&RID=BRRG03P3015) |
| AtWRKY24 | [NP_198972.1](https://www.ncbi.nlm.nih.gov/protein/NP_198972.1?report=genbank&log$=protalign&blast_rank=32&RID=BRRG03P3015) |
| AtWRKY45 | [NP_186846.1](https://www.ncbi.nlm.nih.gov/protein/NP_186846.1?report=genbank&log$=protalign&blast_rank=18&RID=BRRG03P3015) |
| AtWRKY56 | [NP_176583.1](https://www.ncbi.nlm.nih.gov/protein/NP_176583.1?report=genbank&log$=protalign&blast_rank=39&RID=BRRG03P3015) |
| AtWRKY75 | [NP_196812.1](https://www.ncbi.nlm.nih.gov/protein/NP_196812.1?report=genbank&log$=protalign&blast_rank=14&RID=BRRG03P3015) |
| GhWRKY2 | AIE43816.1 |
| GhWRKY3 | AGV75929.1 |
| GhWRKY43 | [XP_016712479.1](https://www.ncbi.nlm.nih.gov/protein/XP_016712479.1?report=genbank&log$=protalign&blast_rank=16&RID=BRRG03P3015) |
| GhWRKY60 | AGV75958.1 |
| GhWRKY75 | XP_016707984.1 |
| GhWRKY94 | AIE43904.1 |
| GmWRKY25 | [NP_001237010.2](https://www.ncbi.nlm.nih.gov/protein/NP_001237010.2?report=genbank&log$=protalign&blast_rank=17&RID=BRRG03P3015) |
| GmWRKY43 | [XP_014631997.1](https://www.ncbi.nlm.nih.gov/protein/XP_014631997.1?report=genbank&log$=protalign&blast_rank=33&RID=BRRG03P3015) |
| GmWRKY53 | [NP_001237357.2](https://www.ncbi.nlm.nih.gov/protein/NP_001237357.2?report=genbank&log$=protalign&blast_rank=8&RID=BRRG03P3015) |
| GmWRKY56 | [KAH1204719.1](https://www.ncbi.nlm.nih.gov/protein/KAH1204719.1?report=genbank&log$=protalign&blast_rank=21&RID=BRRG03P3015) |
| GmWRKY64 | [NP_001348337.1](https://www.ncbi.nlm.nih.gov/protein/NP_001348337.1?report=genbank&log$=protalign&blast_rank=23&RID=BRRG03P3015) |
| GmWRKY75 | [XP_003549123.1](https://www.ncbi.nlm.nih.gov/protein/XP_003549123.1?report=genbank&log$=protalign&blast_rank=9&RID=BRRG03P3015) |
| OsWRKY12 | NC_089035.1 |
| OsWRKY34 | [DAA05099.1](https://www.ncbi.nlm.nih.gov/protein/DAA05099.1?report=genbank&log$=protalign&blast_rank=49&RID=BRRG03P3015) |
| OsWRKY56 | XP_015615223.1 |
| OsWRKY72 | [ALB35168.1](https://www.ncbi.nlm.nih.gov/protein/ALB35168.1?report=genbank&log$=protalign&blast_rank=6&RID=BRRG03P3015) |
| TaWRKY12 | XP_044409544.1 |
| TaWRKY23 | [ACD80379.1](https://www.ncbi.nlm.nih.gov/protein/ACD80379.1?report=genbank&log$=protalign&blast_rank=48&RID=BRRG03P3015) |
| TaWRKY24 | XP_044343635.1 |
| TaWRKY56 | XP_044374371.1 |
| TaWRKY75 | XP_044452279.1 |
