# Supplementary material for: Molecular mechanism of ZmWRKY36 mediated maize resistance to Bipolaris maydis
Source: Research Square preprint supplement (doi:10.21203/rs.3.rs-7738242/v1), 2025-10-26
Supplement: Supplementary file 3 [file df0161c1532ec207721056cf.docx]

| **Supplementary Table 3 Primers used in this study** | |
| --- | --- |
| ID | Primers |
| ZmActin-F | GGTTTCGCTGGTGATGATGC |
| ZmActin-R | CAATGCCATGCTCAATCGGG |
| BmActin-F | ATCGTCCGTGACATCAAGG |
| BmActin-R | ACGCTCGTTTCCAATGGT |
| ZmWRKY36-F | ACAACTTCATGCTGCCCACT |
| ZmWRKY36-R | TGGAGGAGGGCTGCTAGCTG |
| ZmWRKY36-VIGS-F | AGCCAGGTCGACATCCTCGA |
| ZmWRKY36-VIGS-R | ATGTTGTGGCTACTACTGCTG |
| ZmWRKY36-VOX-F | ATGGAGAATTATCACATGCTC |
| ZmWRKY36-VOX-R | TCAGTGAAACATGTTGTGGC |
| GFP-ZmWRKY36-F | ATGGAGAATTATCACATGCTC |
| GFP-ZmWRKY36-R | GTGAAACATGTTGTGGCTAC |
